# Supplementary material for: A small molecule targeting myoferlin exerts promising anti-tumor effects on breast cancer
Source: PubMed Central journal article supplement (PMC6137146; doi:10.1038/s41467-018-06179-0), 2018-09-13
Supplement: 41467_2018_6179_MOESM1_ESM.pdf [file 41467_2018_6179_MOESM1_ESM.pdf]

**A small molecule targeting myoferlin exerts promising anti-tumor effects on breast cancer**

Tao Zhang et al.

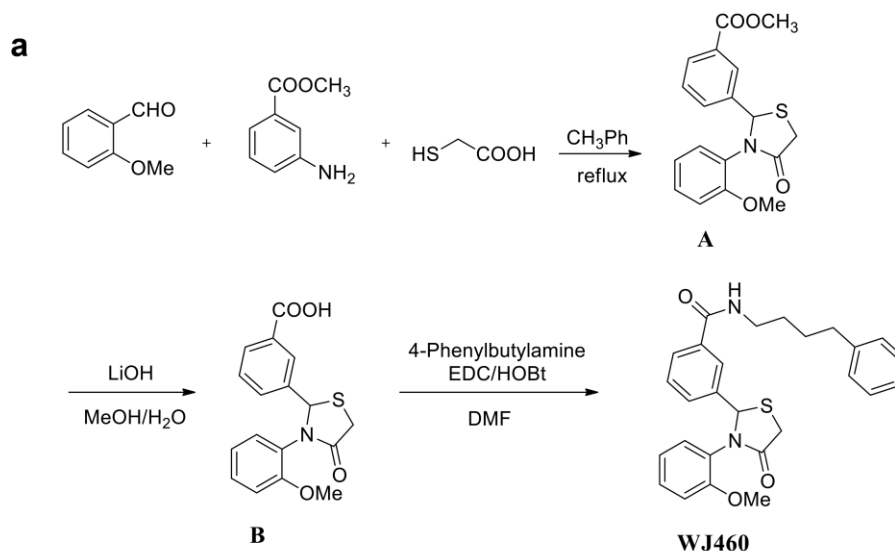

The synthesis scheme of WJ460

**b**

**Acquisition Parameter**

|             |          |                       |           |                  |           |
|-------------|----------|-----------------------|-----------|------------------|-----------|
| Source Type | ESI      | Ion Polarity          | Positive  | Set Nebulizer    | 1.5 Bar   |
| Focus       | Active   | Set Capillary         | 3700 V    | Set Dry Heater   | 180 °C    |
| Scan Begin  | 50 m/z   | Set End Plate Offset  | -500 V    | Set Dry Gas      | 6.0 l/min |
| Scan End    | 1200 m/z | Set Collision Cell RF | 500.0 Vpp | Set Divert Valve | Waste     |

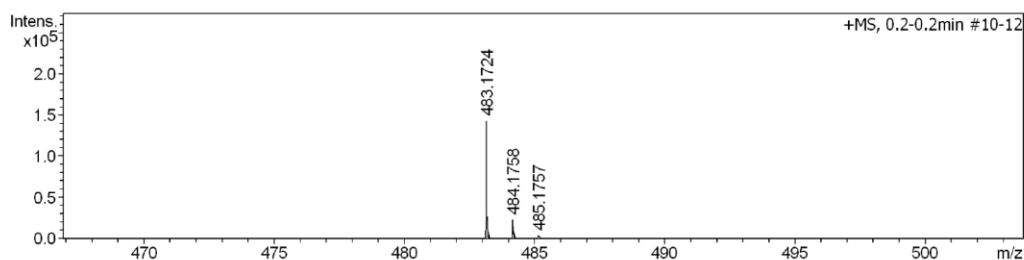

| # | m/z      | Res.  | S/N    | I      | I %   | FWHM   |
|---|----------|-------|--------|--------|-------|--------|
| 1 | 483.1724 | 33691 | 4267.7 | 142252 | 100.0 | 0.0143 |
| 2 | 484.1758 | 24937 | 680.1  | 22670  | 15.9  | 0.0194 |
| 3 | 485.1757 | 15699 | 93.7   | 3120   | 2.2   | 0.0309 |

| Meas. m/z | # | Ion Formula   | m/z      | err [ppm] | mSigma | Score | rdb   | e <sup>-</sup> Conf | N-Rule     |
|-----------|---|---------------|----------|-----------|--------|-------|-------|---------------------|------------|
| 483.1724  | 1 | C27H28N2NaO3S | 483.1713 | -2.3      | 85.5   | 9     | 12.08 | 14.5                | even<br>ok |

**Supplementary Figure 1 (a)** The synthesis scheme of WJ460. The intermediate methyl 3-(3-(2-methoxyphenyl)-4-oxo-2-thiazolidinyl)benzoate (A), constructed from 2-methoxybenzaldehyde, methyl 3-aminobenzoate and thioglycolic acid, was hydrolyzed with LiOH·H<sub>2</sub>O to yield 3-(3-(2-methoxyphenyl)-4-oxo-2-thiazolidinyl)benzoic acid (B), and the key intermediate B was treated with EDC·HCl, HOBt and 4-phenylbutylamine in anhydrous DMF to get the targeted compound 3-(3-(2-methoxyphenyl)-4-oxo-2-thiazolidinyl)-N-(4-phenylbutyl) benzamide (WJ-460). HPLC purity: 99%. All reactions were monitored by TLC and UV light, column

chromatography was performed on silica gel, HPLC (Agilent Technologies 1200 Series) was utilized for purity, injection volume was 10  $\mu$ L, flow rate of 1.5 mL/min, solvent A: H<sub>2</sub>O; solvent B: MeOH; gradient of 40–90% B (0–10 min), 90% B (10–15 min), 90–40% B (15–20 min). **(b)** The high-resolution mass spectrum (HR MS) of WJ460. HRMS (ESI): calcd for [C<sub>27</sub>H<sub>28</sub>N<sub>2</sub>O<sub>3</sub>S + Na]<sup>+</sup> 483.1713, found 483.1724. High-resolution mass spectrum (HRMS) was gathered on a Bruker MicroTOF-Q II LCMS instrument operating in electrospray ionization (ESI).

**a**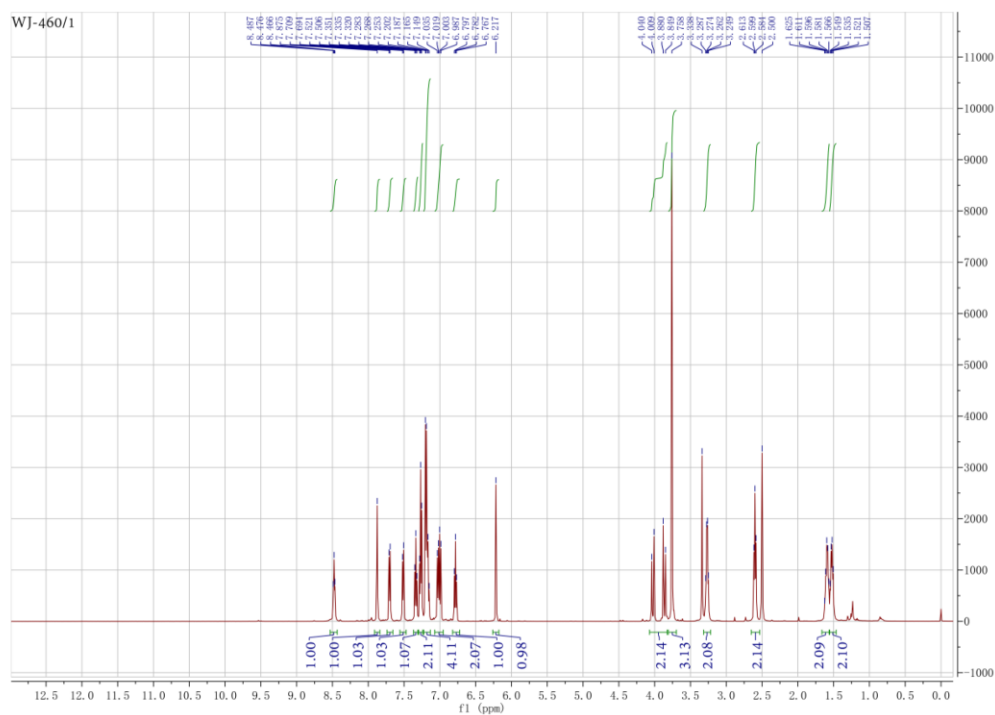**b**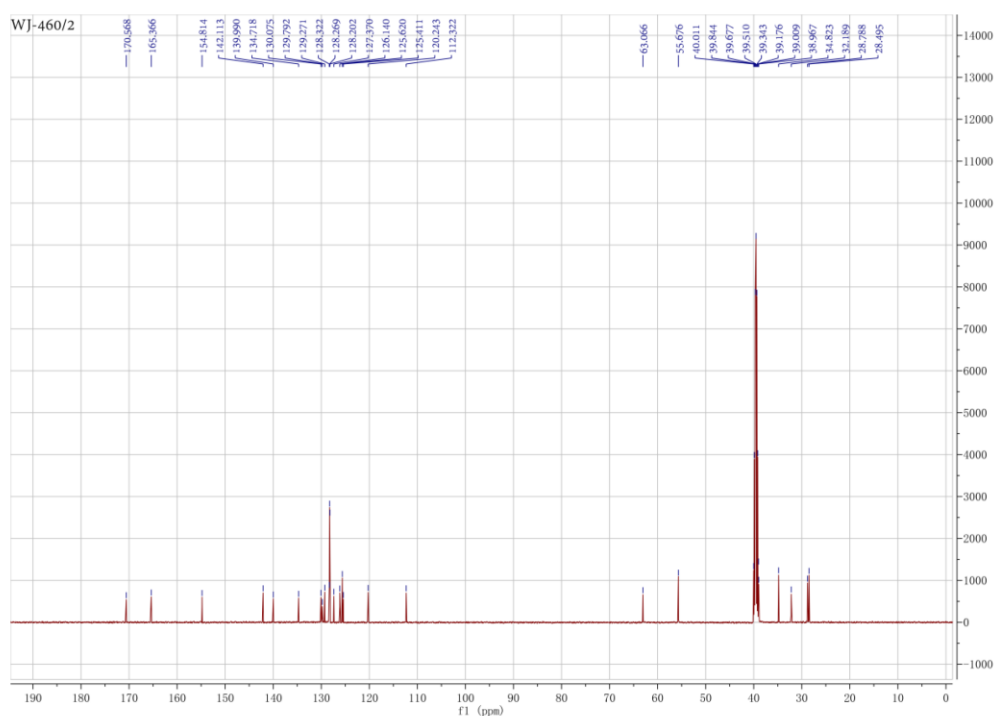

**Supplementary Figure 2** (a)  $^1\text{H}$  NMR spectrum of WJ460 ( $\text{DMSO-}d_6$ , 500 MHz):  $\delta$  8.64 (t,  $J = 5.5$  Hz, 1H), 7.88 (s, 1H), 7.70 (d,  $J = 7.5$  Hz, 1H), 7.51 (d,  $J = 7.0$  Hz, 1H), 7.34 (dd,  $J = 7.5, 7.5$  Hz, 1H), 7.27 (dd,  $J = 7.5, 7.5$  Hz, 2H), 7.20-7.15 (m, 4H), 7.01 (dd,  $J = 8.0, 8.0$  Hz, 2H), 6.78 (t,  $J = 5.0$  Hz, 1H), 6.22 (s, 1H), 4.04-3.85 (m,

2H), 3.76 (s, 3H), 3.29-3.25 (m, 2H), 2.61-2.58 (m, 2H), 1.63-1.57 (m, 2H), 1.55-1.51 (m, 2H). **(b)**  $^{13}\text{C}$  NMR spectrum of WJ460 (DMSO- $d_6$ , 125 MHz):  $\delta$  170.57, 165.37, 154.81, 142.11, 139.99, 134.72, 130.08, 129.79, 129.27, 128.32, 128.27, 128.20, 127.37, 126.14, 125.62, 125.41, 120.24, 112.32, 63.07, 55.68, 38.97, 34.82, 32.19, 28.79, 28.49. NMR spectra were recorded on a Bruker 500 MHz instrument and obtained as DMSO- $d_6$  solutions (reported in ppm).

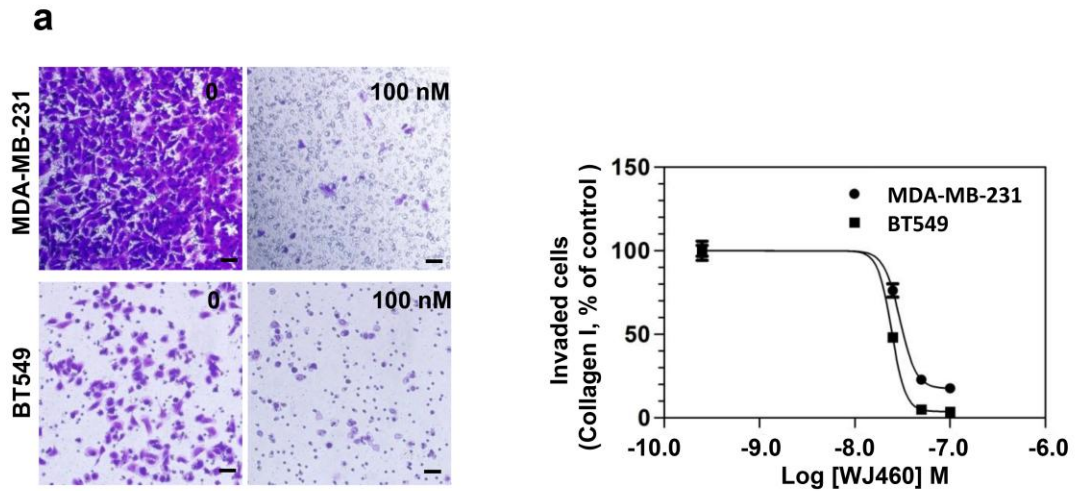

**Supplementary Figure 3 (a)** WJ460 impaired breast cancer cell invasion through collagen I. MDA-MB-231 and BT549 cells were seeded into each transwell insert precoated with 10% collagen I. After 12 h, invading cells were stained with 0.1% crystal violet. Images were acquired using an inverted microscope (Olympus). WJ460 inhibits MDA-MB-231 and BT549 cell invasion through collagen I with IC<sub>50</sub> of  $29.7 \pm 1.18$  nM and  $24.3 \pm 0.92$  nM, respectively ( $n = 3$ ). Scale bars, 50  $\mu$ m.

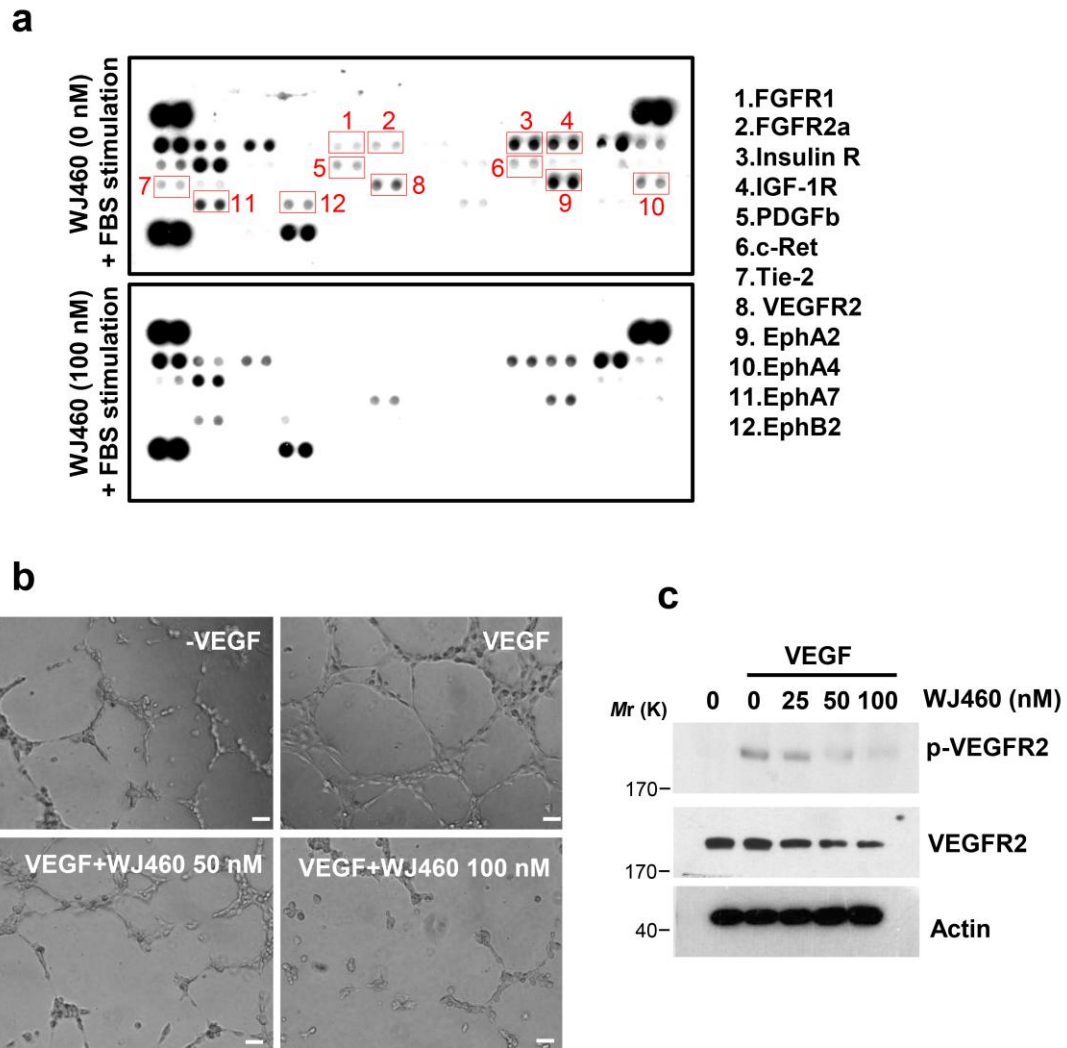

**Supplementary Figure 4** WJ460 blocked receptor tyrosine kinases activities and VEGF-induced angiogenesis. **(a)** Screening of signaling pathways inhibited by WJ460 in MDA-MB-231 metastatic breast cancer cells by probing a human phospho-tyrosine kinase array with lysates from cells stimulated by FBS (10%) in the presence or absence of WJ460 (100 nM). Proteins showing decreased phosphorylation upon WJ460 treatment are highlighted. **(b)** HUVECs ( $5 \times 10^4$ ) were seeded in Matrigel-coated wells for 6 hours in the presence or absence of WJ460 (100 nM) and VEGF (100 ng/mL). Cells were fixed, and tubular-like structures were photographed. **(c)** HUVECs were pretreated with WJ460 and stimulated with VEGF (100 ng/mL) ( $n = 3$ ). Scale bars, 20  $\mu$ m. Proteins were extracted and subjected to immunoblotting with indicated antibodies ( $n = 3$ ). In **b** and **c**,  $n$  indicates the number of independent experiments performed.

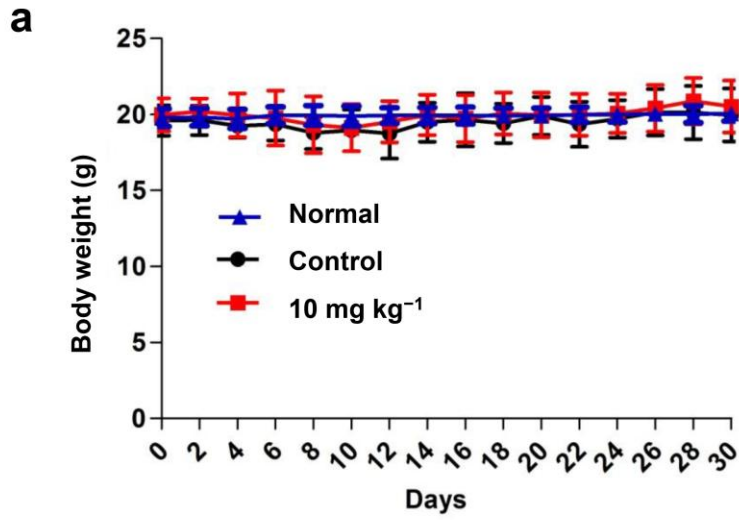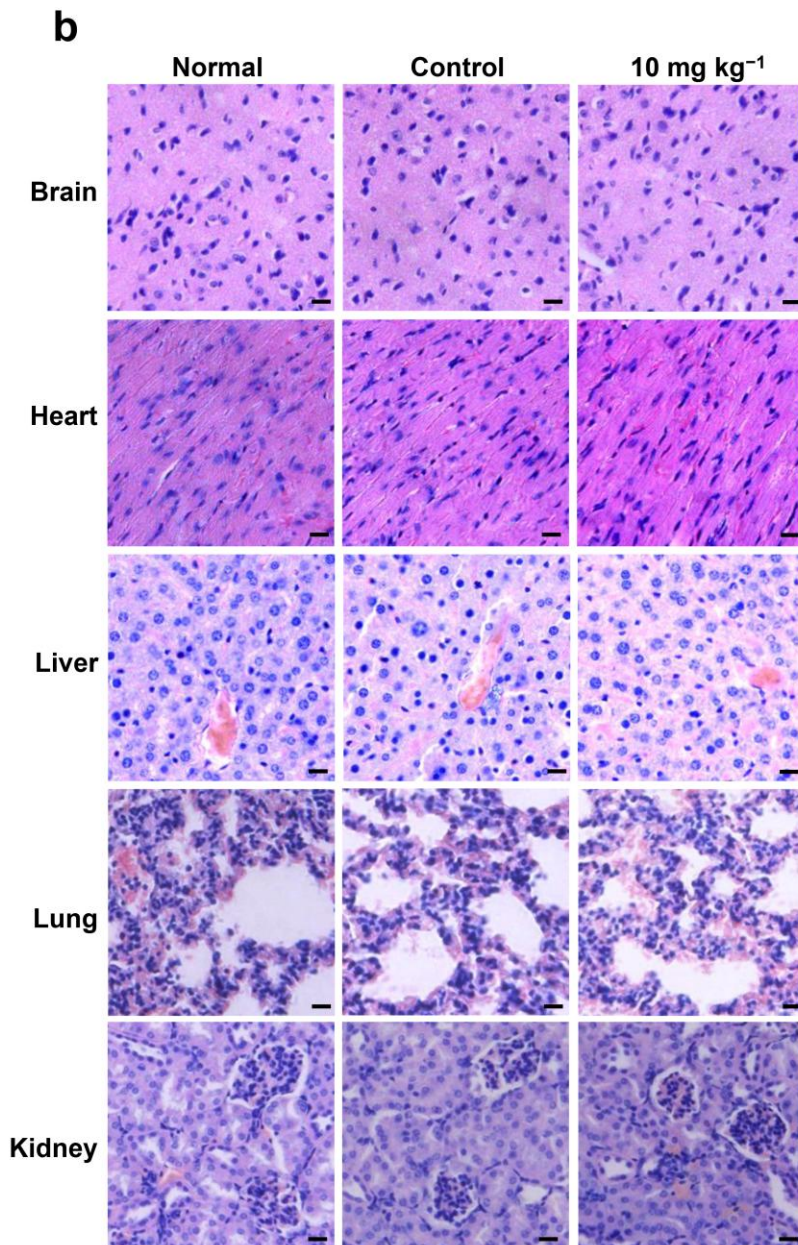



**Supplementary Figure 5** WJ460 showed little toxicity in mice. **(a)** 8 week-old female BALB/c mice were left untreated (Normal) or treated with DMSO (Control) or WJ460 (i.p.) for 30 days. Mice body weight was measured every other day. **(b)** When the experiment terminated, major organs in each group were freshly dissected, fixed and paraffin-embedded. H&E staining of sections followed by histopathological analysis was performed. Scale bars, 20  $\mu\text{m}$ .

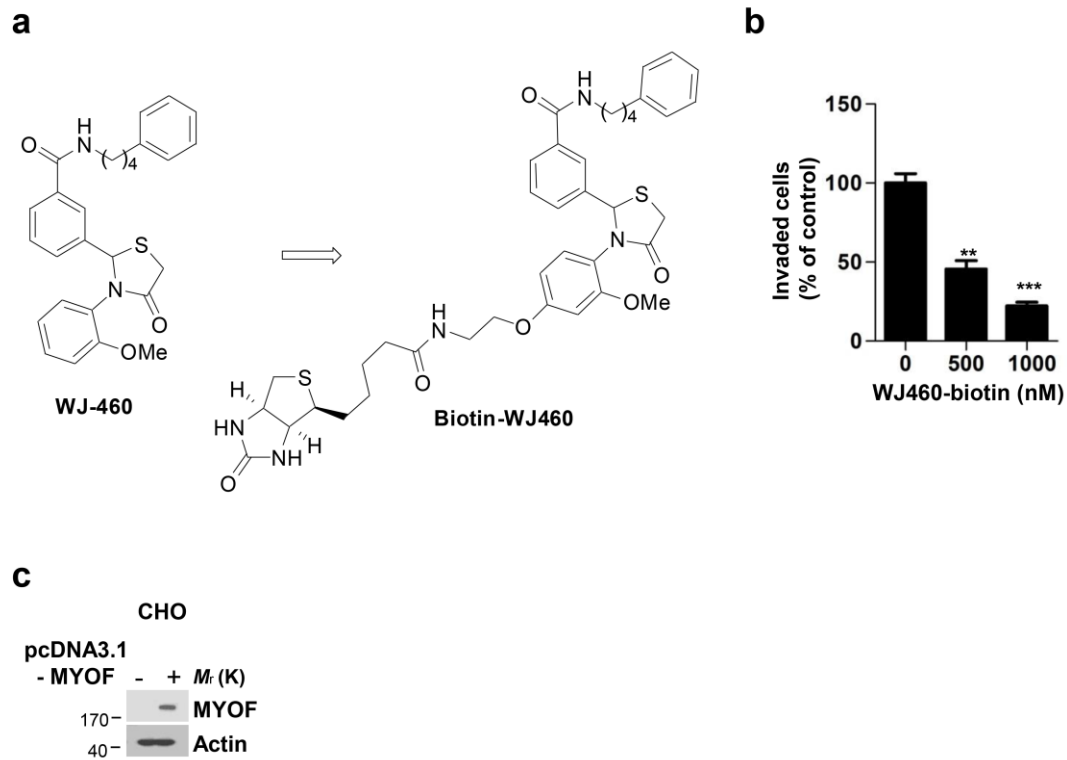

**Supplementary Figure 6** Myoferlin is a target of WJ460. **(a)** Chemical structure of WJ460 and WJ460-biotin. **(b)** WJ460-biotin suppressed MDA-MB-231 cell invasion, Data shown are mean  $\pm$  s.d. \*\*  $p < 0.01$ , \*\*\*  $p < 0.001$ . Student's t test,  $n = 3$ . **(c)** CHO cells were forced to express human myoferlin, cell lysates were extracted and detected by western blot ( $n = 3$ ). In **b** and **c**,  $n$  indicates the number of independent experiments performed.

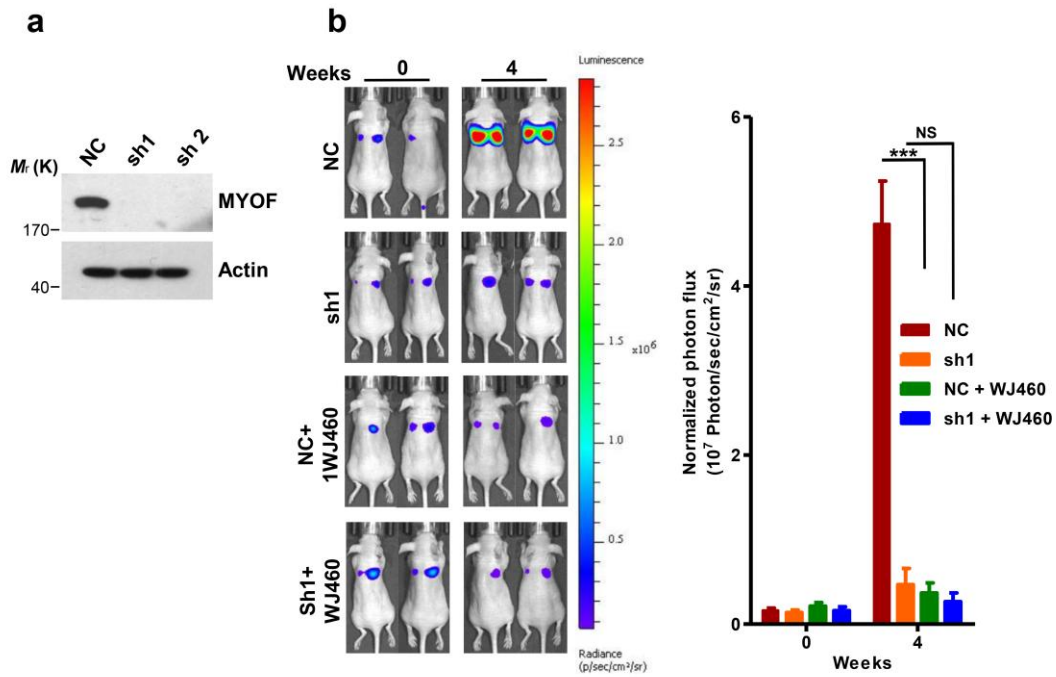

**Supplementary Figure 7** Myoferlin knockdown in MDA-MB-231-Luciferase cells impaired lung metastases. **(a)** Myoferlin was knocked down by specific shRNAs in MDA-MB-231-Luciferase cells ( $n = 3$ ). **(b)** Myoferlin knockdown in MDA-MB-231-Luciferase cells rendered cancer cells resistant to WJ460 treatment in animal model. Cells were transfected with scrambled shRNA or MYOF shRNA, and then were inoculated intravenously into female nude mice. DMSO or WJ460 was injected intraperitoneally.

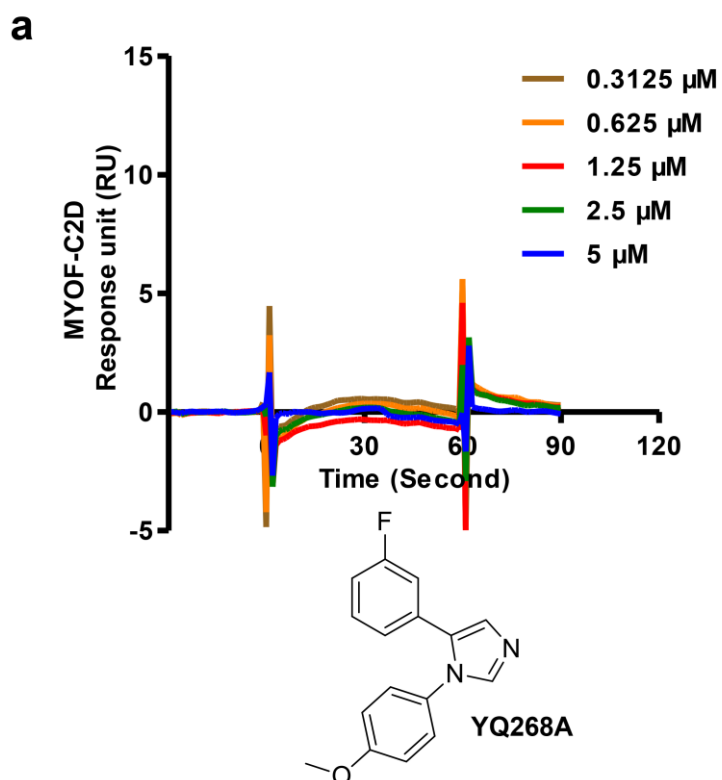

**Supplementary Figure 8 (a)** The binding between a negative molecule (YQ268A) and MYOF C2D domain was examined by surface plasmon resonance (SPR) assay.

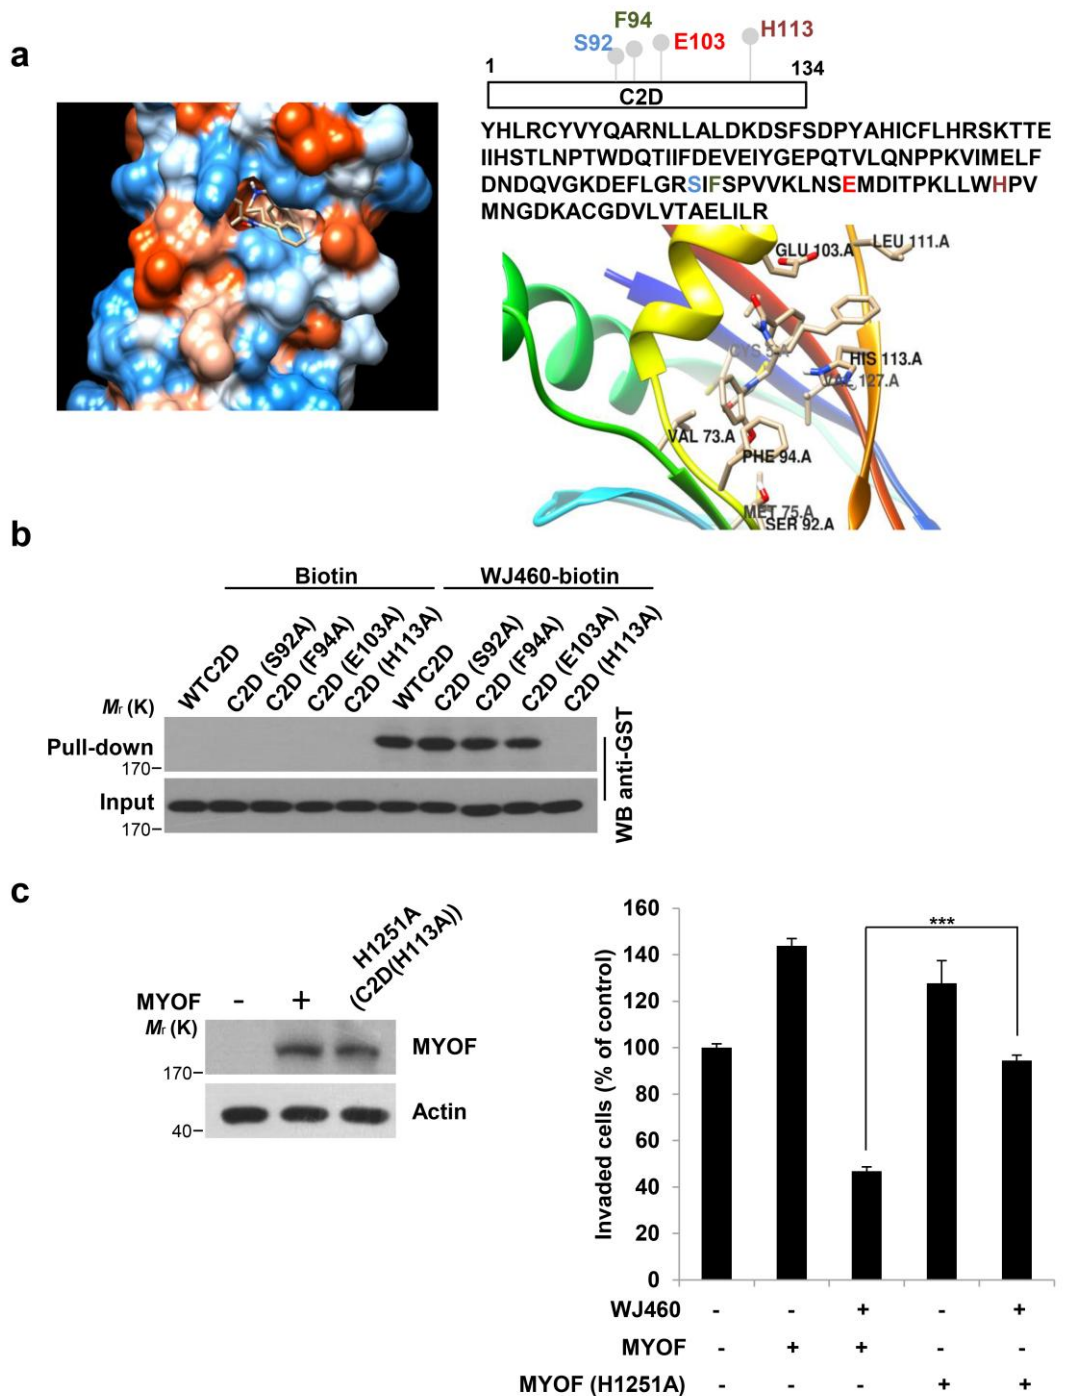

**Supplementary Figure 9** C2D domain of MYOF is responsible for its interaction with WJ460. (a) Binding model of WJ460 in MYOF-C2D (left). A homology modeling assay was performed and the potential amino acid residues responsible for the binding between WJ460 and C2D domain were highlighted. (b) Recombinant wild-type (WT) MYOF-C2D and its mutants were incubated with biotin or WJ460-biotin, followed by pull down assay. (c) Boyden-chamber cell invasion assay of

MDA-MB-231 cells transfected with MYOF or mutants of MYOF vector in the presence or absence of WJ460 (100 nM).

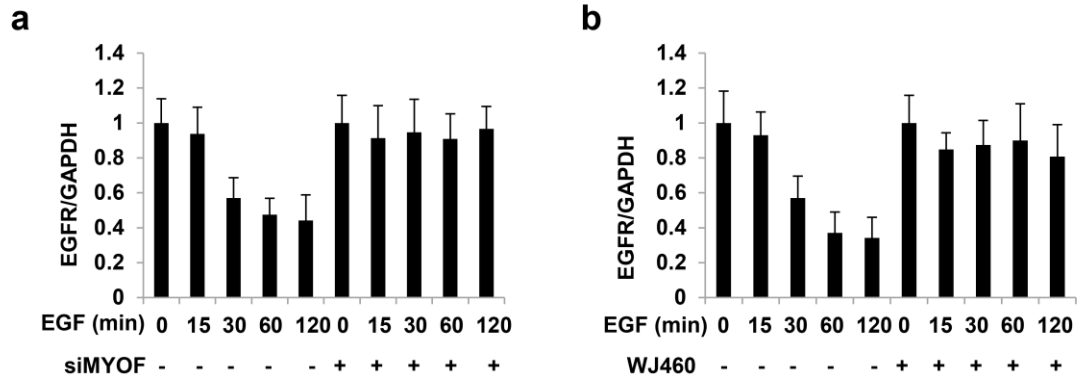

**Supplementary Figure 10** The EGFR bands in Figure 5 d and e were quantified and normalized according GAPDH, n = 3.

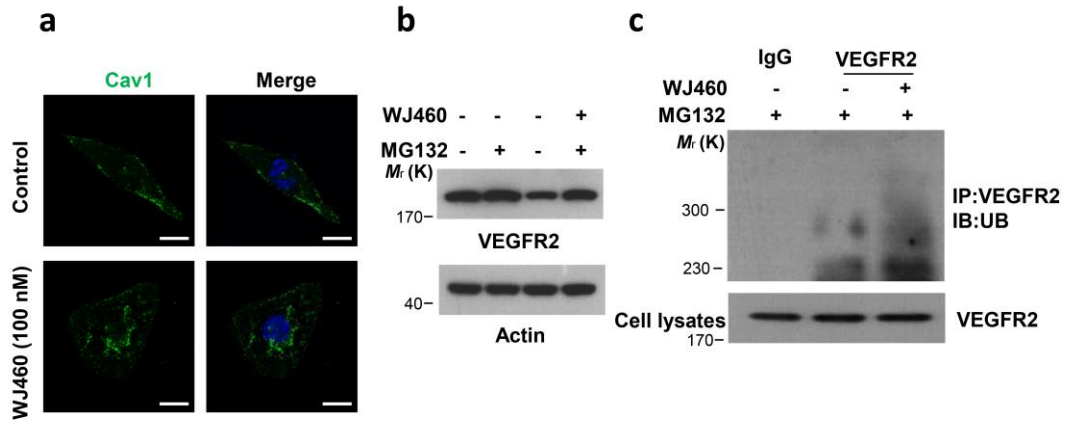

**Supplementary Figure 11** WJ460-MYOF interaction hampers the proper function of MYOF. (a) Immunofluorescence analysis of Cav1 in WJ460 treated MDA-MB-231 cells 120 min post-EGF stimulation. scale bars, 10  $\mu$ m. (b) HUVECs cells were treated with WJ460 (100 nM) with or without MG132 (10  $\mu$ M) and VEGFR2 protein level was measured by western blotting analysis. (c) Immunoprecipitation (IP) was performed using anti-VEGFR2 and immunoblotting performed with an anti-ubiquitin antibody.



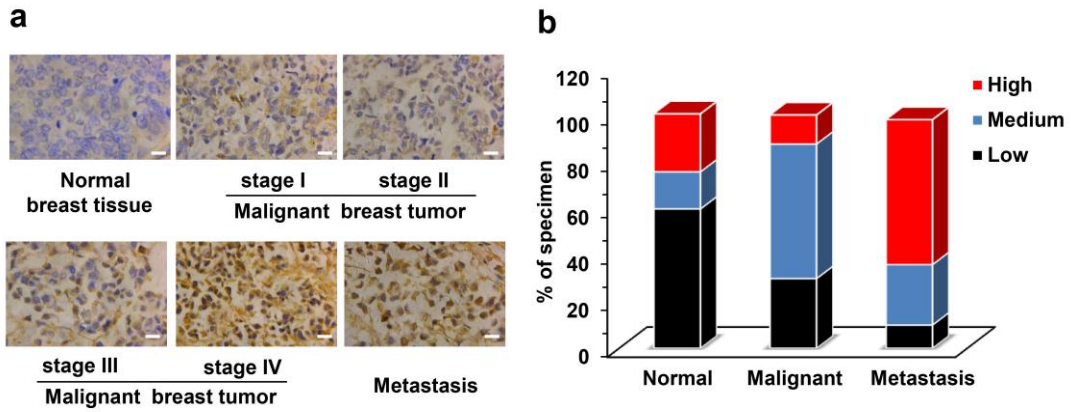

**Supplementary Figure 12** A role of MYOF in the pathogenesis of breast cancer. **(a)** Representative immunohistochemical (IHC) staining of MYOF in 90 human breast cancer biopsy samples and 10 adjacent non-transformed specimens. Scale bar, 50  $\mu$ m. **(b)** The proportion of MYOF expression level was calculated in 3 different breast cancer stage samples (normal, malignant and metastasis).

**Figure 4**

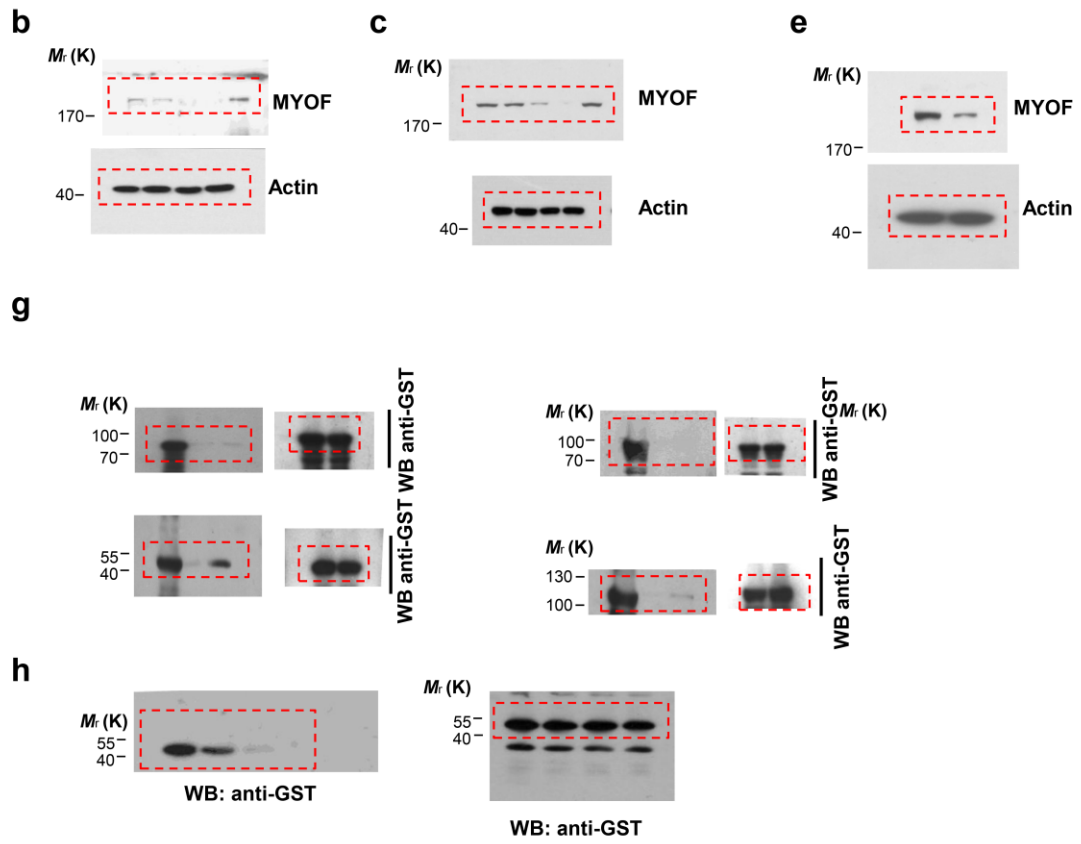

**Figure 5**

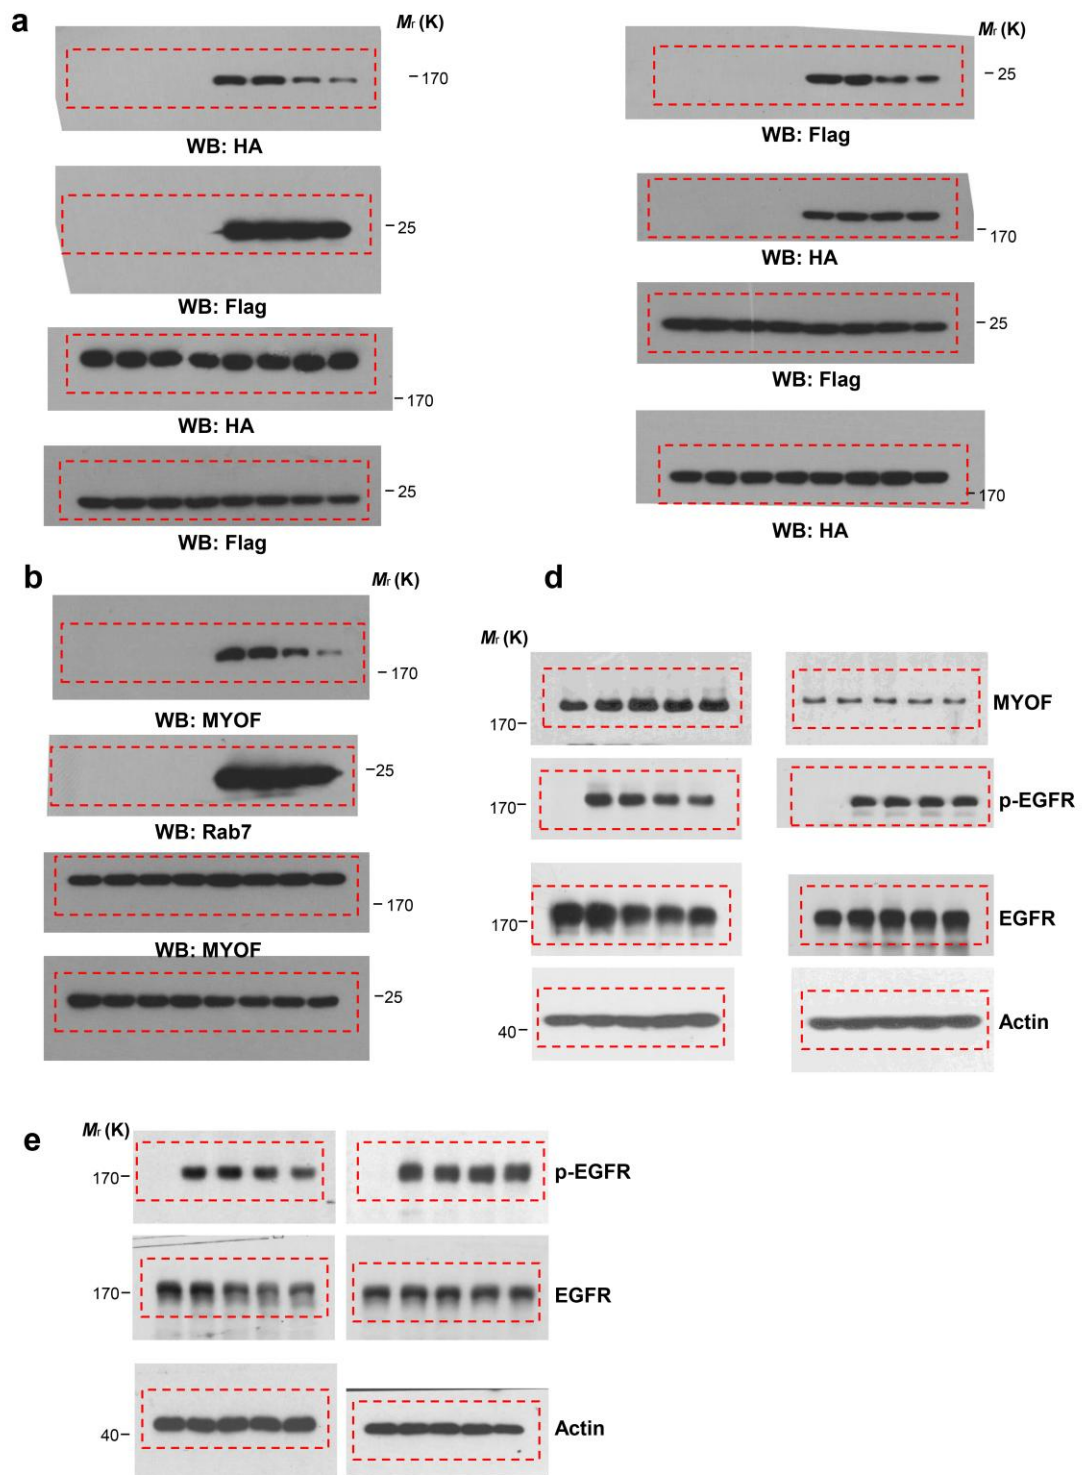

**Figure 6**

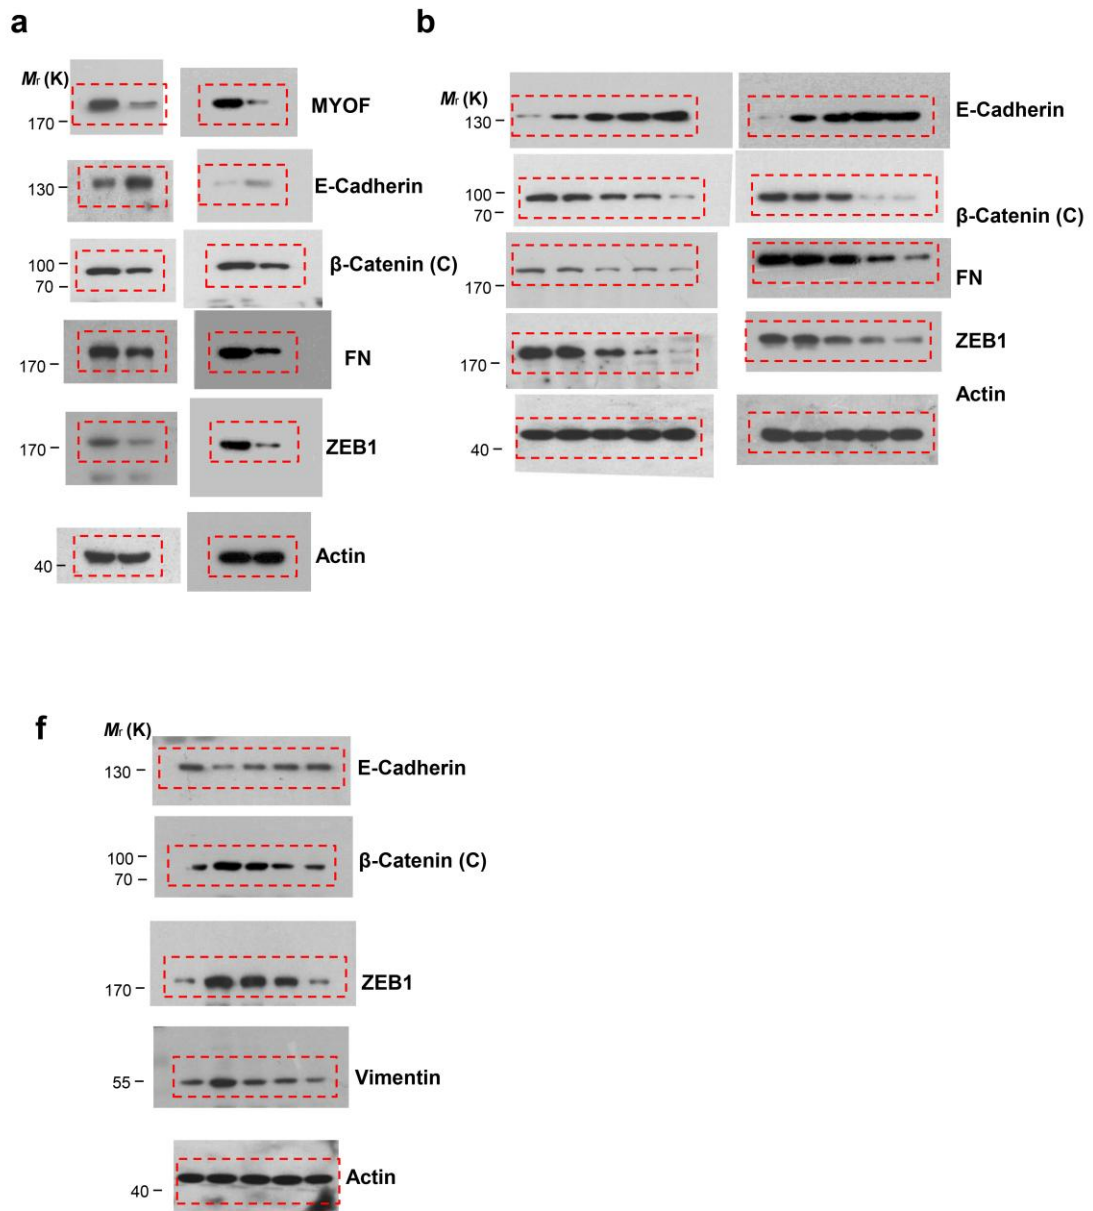

**Supplementary Figure 4**

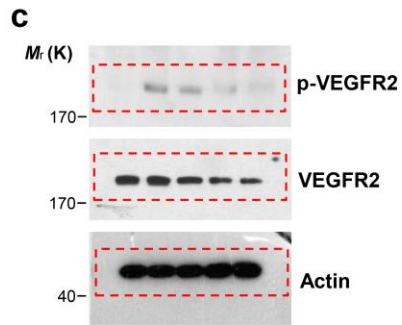

**Supplementary Figure 6**

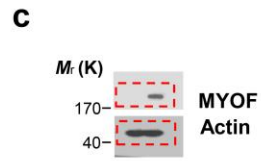

**Supplementary Figure 7**

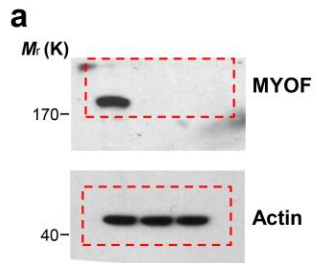

**Supplementary Figure 9**

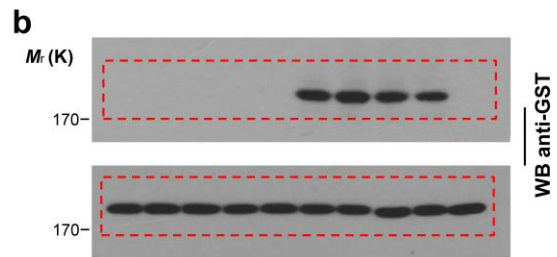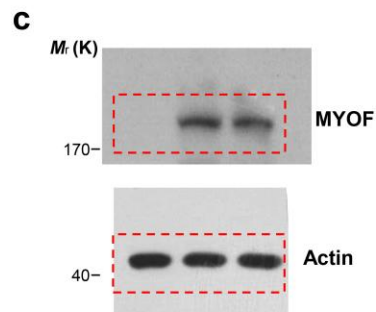

**Supplementary Figure 11**

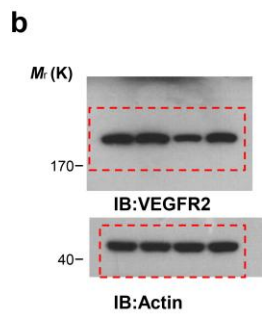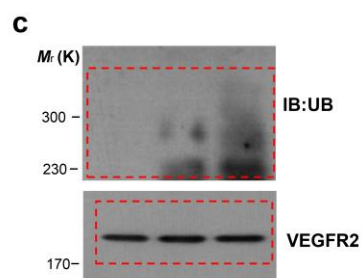

**Supplementary Figure 13** Unprocessed original scans of blots.

| Peptide sequence                                | MH+       | DeltCN | xCorr  |
|-------------------------------------------------|-----------|--------|--------|
| <b>MYOF isoform of Myoferlin [Homo sapiens]</b> |           |        |        |
| R.GIPLDFSSSLGIIVK.D                             | 1545.889  | 0.4138 | 2.2926 |
| K.GPVGTVSEAQLAR.R                               | 1284.6937 | 0.447  | 3.389  |
| K.VSMFVLGTGDEPPERR.D                            | 1887.9474 | 0.2435 | 2.5386 |
| R.DRDNDSDDVESNLLLPAGIALR.W                      | 2398.19   | 0.2673 | 3.7722 |
| R.AEDIPQMDDAFSQTVK.E                            | 1794.8226 | 0.3574 | 2.2508 |
| K.NLVDPFVEVSFAGK.K                              | 1522.979  | 0.0491 | 3.0832 |
| K.NDVVGTTYLHLSK.I                               | 1446.764  | 0.1791 | 2.6768 |
| R.ILVELATFLEK.T                                 | 1275.7585 | 0.1868 | 3.0928 |
| K.LEPISNDDLLVVEK.Y                              | 1583.8551 | 0.1886 | 2.3723 |
| R.SLSQIHEAAVR.M                                 | 1210.6543 | 0.192  | 2.0355 |
| R.IPAHQVLYSTSGENASGK.Y                          | 1858.9323 | 0.2737 | 3.0761 |
| R.SLLTEADAGHTEFTDEVYQNESR.Y                     | 2613.179  | 0.4753 | 3.8001 |
| R.YPGGDWKPAAEDTYTDANGDK.A                       | 2200.953  | 0.4963 | 4.3918 |
| K.LEGALGADTTEDGDEK.S                            | 1620.7266 | 0.2505 | 1.9474 |
| K.HSATTVFGANTPIVSCNFDR.V                        | 2194.0337 | 0.4253 | 3.2213 |
| R.KPVVGQCTIER.L                                 | 1286.6886 | 0.1265 | 2.2279 |
| R.DIVIEMEDTKPLLASK.L                            | 1801.9656 | 0.2751 | 2.659  |
| R.DIVIEMEDTKPLLASK.L                            | 1801.966  | 0.1274 | 2.7698 |
| R.GKSDENEDPSVVGFEK.G                            | 1736.8033 | 0.3623 | 2.1178 |
| R.GKSDENEDPSVVGFEK.G                            | 1736.8035 | 0.2078 | 2.3651 |
| R.IYPLPDDPSVPAPPR.Q                             | 1633.8616 | 0.3849 | 2.826  |
| R.ELPDSVPQECTVR.I                               | 1529.7279 | 0.3224 | 2.6846 |
| R.GLELQPQDNNGLCDPYIK.I                          | 2075.9973 | 0.4505 | 2.8088 |
| K.ISVYDYDTFTR.D                                 | 1379.6488 | 0.4023 | 3.3728 |
| K.VGETIIDLENR.F                                 | 1258.666  | 0.3742 | 3.8018 |
| R.FGSHCGIPEEYCVSGVNTWR.D                        | 2356.0303 | 0.2608 | 2.3972 |
| R.DQLRPTQLLQNVAR.F                              | 1651.9253 | 0.3196 | 3.9068 |
| R.FKGFPQPILSEDGSR.I                             | 1678.8644 | 0.3798 | 2.7113 |

**Supplementary Table 1** (Relevant to Figure 3a) Myoferlin is identified by LC-MS/MS.

| Antibody         | Vendor | Catalogue number | Application | Dilution |
|------------------|--------|------------------|-------------|----------|
| Ki67             | Abcam  | ab16667          | IHC-P       | 1:100    |
| CD31             | Abcam  | ab28364          | IHC-P       | 1:50     |
| MYOF             | Abcam  | ab76746          | WB          | 1:1000   |
|                  |        |                  | IHC-P       | 1:100    |
| Actin            | Sigma  | A5441            | WB          | 1:10000  |
| GST              | CST    | 2624             | IP          | 1:200    |
|                  |        |                  | WB          | 1:1000   |
| HA               | CST    | 3724             | IP          | 1:50     |
|                  |        |                  | WB          | 1:5000   |
|                  |        |                  | IF          | 1:1600   |
| Flag             | CST    | 8146             | IP          | 1:50     |
|                  |        |                  | WB          | 1:1000   |
|                  |        |                  | IF          | 1:1600   |
| Rab7             | CST    | 9367             | IP          | 1:100    |
|                  |        |                  | WB          | 1:1000   |
| EGFR             | CST    | 4267             | WB          | 1:1000   |
| p-EGFR           | CST    | 3777             | WB          | 1:1000   |
| E-cadherin       | CST    | 3195             | WB          | 1:1000   |
|                  |        |                  | IF          | 1:200    |
| $\beta$ -Catenin | CST    | 9562             | WB          | 1:1000   |
| Fibronectin      | Abcam  | ab137720         | WB          | 1:1000   |
|                  |        |                  | IF          | 1:200    |
| ZEB1             | CST    | 3396             | WB          | 1:1000   |
| Vimentin         | CST    | 5741             | WB          | 1:1000   |
|                  |        |                  | IF          | 1:100    |
| VEGFR2           | CST    | 9698             | WB          | 1:1000   |
|                  |        |                  | IP          | 1:100    |
| p-VEGFR2         | CST    | 2478             | WB          | 1:1000   |
| Ubiquitin        | Abcam  | ab134953         | WB          | 1:1000   |
| Caveolin-1       | CST    | 3267             | WB          | 1:1000   |
|                  |        |                  | IF          | 1:400    |

**Supplementary Table 2** Information for antibodies.

| PCR primers                |         |                                         |
|----------------------------|---------|-----------------------------------------|
| Gene                       |         | Sequence                                |
| CDH1                       | Forward | 5' CGAGAGCTACACGTTACGG 3'               |
|                            | Reverse | 5' GGGTGTGCGAGGGAAAAATAGG 3'            |
| FN                         | Forward | 5' GAGAATAAGCTGTACCATCGCAA 3'           |
|                            | Reverse | 5' CGACCACATAGGAAGTCCCAG 3'             |
| ACTB                       | Forward | 5' CATGTACGTTGCTATCCAGGC 3'             |
|                            | Reverse | 5' CTCCTTAATGTCACGCACGAT 3'             |
| MYOF siRNAs                |         |                                         |
| MYOF siRNA1                |         | 5' CCCUGUCUGGAAUGAGA 3'                 |
| MYOF siRNA2                |         | 5' CGGCGGAUGCUGUCAAUA 3'                |
| MYOF shRNAs                |         |                                         |
| MYOF shRNA1                |         | 5' AGCTGATATTGATGGACAGTA 3'             |
| MYOF shRNA2                |         | 5' CGGGATGTTTCCACAACCGAATT 3'           |
| MYOF expression constructs |         |                                         |
| F1                         |         | 5' CGGGATTCCGTGCGAGTGATTGTGGAATCT 3'    |
|                            |         | 5' CCGCTCGAGGCCTCTGTAGGCAACTCCTTC 3'    |
| F2                         |         | 5' CGGGATTCCGAGGATCTTGTTGAATTAG 3'      |
|                            |         | 5' CCGCTCGAGGTGCTTCTGTTTCTCCAGGCT 3'    |
| F3                         |         | 5' CGGGATTCCGAGTGCCACCACTGTGTTCCGGAG 3' |
|                            |         | 5' CCGCTCGAGCCTCAGAATCAGCTCTGCAGTT 3'   |
| F4                         |         | 5' CGGGATTCCGGGCAAGGATGGCTCCAAC 3'      |
|                            |         | 5' CCGCTCGAGCATGGCTTTGAGTCCGGAAT 3'     |

**Supplementary Table 3** Information for PCR primers and the sequences of siRNAs and shRNAs.
